# Supplementary material for: Glycosphingolipids are linked to elevated neurotransmission and neurodegeneration in a Drosophila model of Niemann Pick type C
Source: PubMed Central journal article supplement (PMC10581387; doi:10.1242/dmm.050206), 2023-10-12
Supplement: dmm-16-050206-s1.pdf [file dmm-16-050206-s1.pdf]

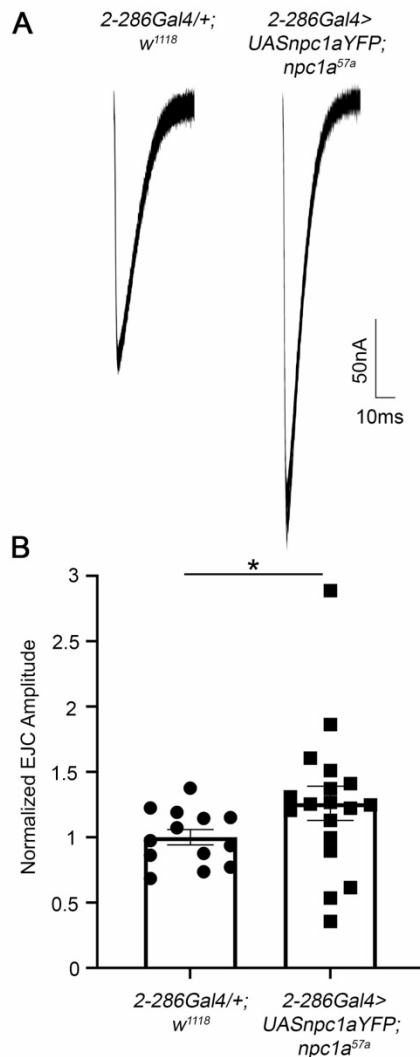

**Fig. S1. Ring gland rescued *npc1a* mutants display elevated neurotransmission**

**A)** Representative excitatory junction current (EJC) traces showing ten superimposed two-electrode voltage-clamp (TEVC) recordings from the ring gland Gal4 driver control (2-286-Gal4/*w<sup>1118</sup>*, left) compared to the homozygous *npc1a* null mutant with a ring gland driven *npc1a* (*npc1a<sup>57a</sup>/npc1a<sup>57a</sup>; 2-286-Gal4> UAS-*npc1a*::YFP*). **B)** Quantified EJC amplitudes normalized to the control (n=13) compared to the ring gland rescued condition (n=18). Mann-Whitney tests show that the ring gland rescued *npc1a* mutant remains significantly elevated (\*) compared to control (p=0.0464).

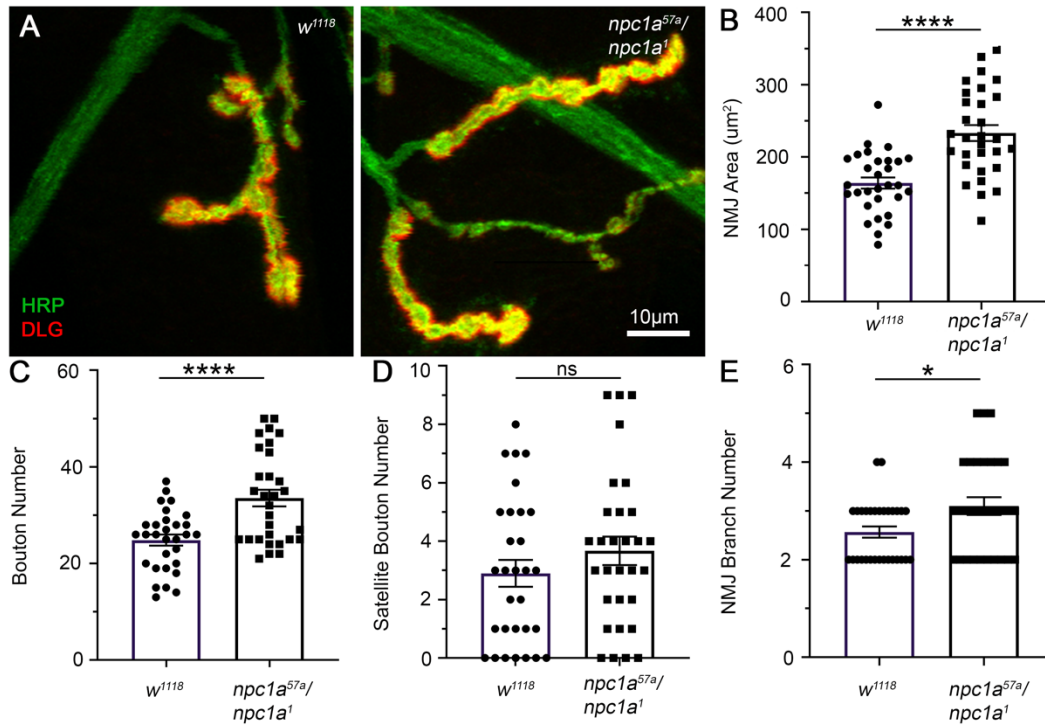

**Fig. S2. Null *npc1a* mutants display structural synaptic overgrowth at the NMJ**

**A)** Representative NMJs co-labeled with the synaptic membrane marker anti-horse radish peroxidase (HRP, green) and synaptic scaffold anti-Discs Large (DLG, red) in the genetic background control (*w<sup>1118</sup>*, left) and *npc1a* null (*npc1a<sup>57a</sup>/*npc1a*<sup>1</sup>*, right). **B)** Quantification of HRP-defined NMJ area shows significant increase (\*\*\*\*) in *npc1a* mutants compared to controls based on a t-test (n=30 for both; p<0.0001). **C)** Quantification of synaptic bouton number shows significant increase (\*\*\*\*) in *npc1a* mutants compared to controls based on a t-test (p<0.0001). **D)** Quantification of satellite bouton number shows no significant (ns) change. **E)** Quantification of NMJ branch number shows a significant increase (\*) in *npc1a* mutants compared to controls based on a t-test (p=0.0159).

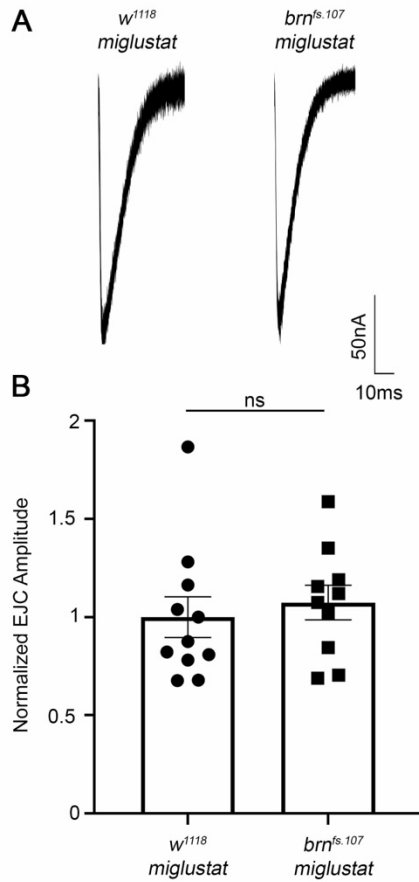

**Fig. S3. Miglustat restores *brn* mutant neurotransmission strength to control levels**

**A)** Representative EJC traces from wandering third instar NMJ of the genetic background control (*w<sup>1118</sup>*, left) and *brainiac* mutants (*brn<sup>fs.107</sup>*, right) fed from hatching with miglustat (10 ng/ml) to inhibit glucosylceramide synthase. **B)** Quantification of EJC amplitudes normalized to the *w<sup>1118</sup>* control on miglustat (n=11) compared to *brn<sup>fs.107</sup>* on miglustat (n=10) shows no significant (ns) difference (p=0.3494).

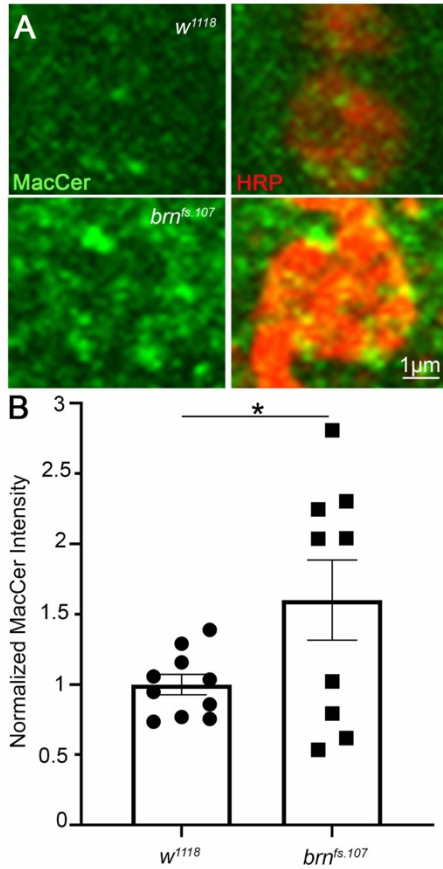

**Fig. S4. *brn* mutants display elevated synaptic MacCer accumulation at the NMJ**

**A)** Representative confocal images of anti-mannosylglucosylceramide (MacCer, green) co-labeled with the synaptic membrane marker anti-horse radish peroxidase (HRP, red) at the wandering third instar neuromuscular junction (NMJ) in the genetic background control (*w<sup>1118</sup>*, top) and *brn<sup>fs.107</sup>* mutant (bottom). MacCer labeling alone (green) is shown on the left, and with the HRP synaptic marker (red) on the right. **B)** Quantification of MacCer fluorescent intensity normalized to the *w<sup>1118</sup>* control (n=10) shows that *brn<sup>fs.107</sup>* mutants (n=9) are significantly elevated (\*) compared to control (p=0.0465).

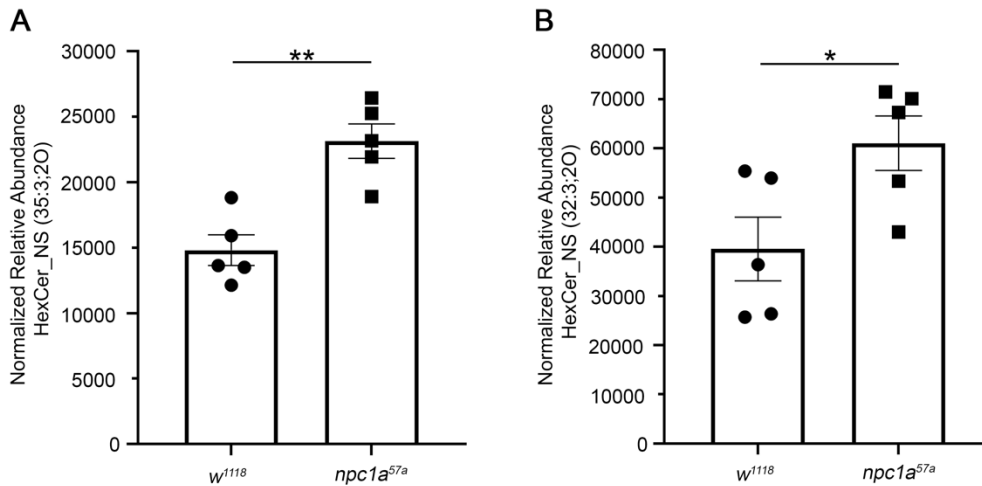

**Fig. S5. Mass spectrometry shows *npc1a* mutants display elevated HexCer levels**

Lipid mass spectrometry paired with liquid chromatography in positive ion mode used to assess lipid levels of wandering third instar larva in the *w<sup>1118</sup>* control and *npc1a<sup>57a</sup>* mutant.

**A)** Normalized levels of HexCer\_NS (35:3;20) in wandering third instars are significantly increased (\*\*) in *npc1a<sup>57a</sup>* mutants (n=5) compared to *w<sup>1118</sup>* genetic background controls (n=5) based on a one-way ANOVA (p=0.00157). **B)** Normalized levels of HexCer\_NS (32:3;20) in in wandering third instars are also significantly increased (\*) in the *npc1a<sup>57a</sup>* mutants (n=5) compared to *w<sup>1118</sup>* controls (n=5) based on a one-way ANOVA (p=0.0407).

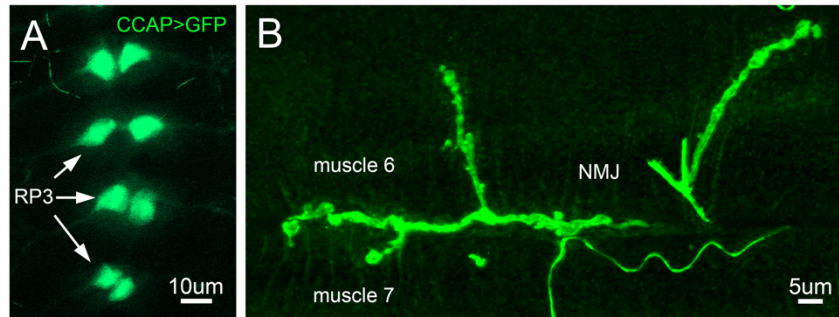

**Fig. S6. *Ccap-Gal4* driver is specific to RP3 motor neurons innervating muscles 6/7**

**A)** High magnification image of the ventral nerve cord (VNC) midline in a wandering third instar with *ccap-Gal4* driving *UAS-GFP* (green). The pair of raw prawn 3 (RP3) motor neurons in each of four segments are highlighted with white arrows. **B)** Representative neuromuscular junction (NMJ) image of RP3 innervating the ventral longitudinal muscles 6 and 7 with *ccap-Gal4* driving *UAS-GFP* (green).

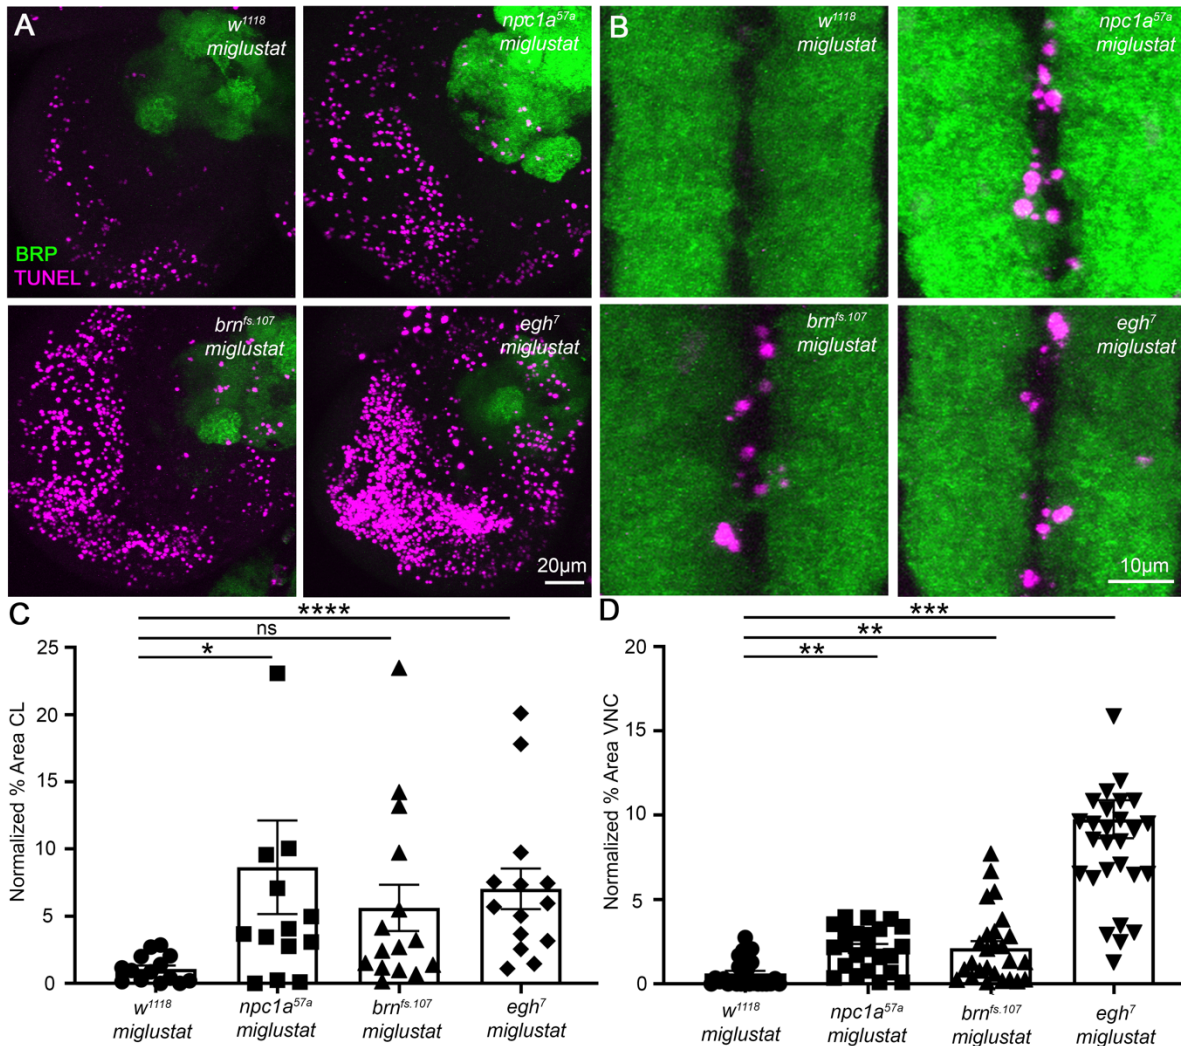

**Fig. S7. Miglustat feeding does not prevent neuron death in  $npc1a$  or GSL mutants**

**A)** Representative brain cerebral lobe (CL) co-labeling for TUNEL (red) and BRP (green) in miglustat-fed genetic control ( $w^{1118}$ ),  $npc1a^{57a}$ ,  $brn^{fs.107}$ , and  $egh^7$ . **B)** Ventral nerve cord (VNC) labeling in the same conditions. **C)** Quantification of CL percent TUNEL area normalized to control (n=26) for  $npc1a^{57a}$  (n=23),  $brn^{fs.107}$  (n=26), and  $egh^7$  (n=30) shows significant increases for  $npc1a^{57a}$  (\*; p=0.0251) and  $egh^7$  (\*\*\*\*; p<0.0001), but not  $brn^{fs.107}$  (ns; p=0.2734) from Kruskal Wallance test with multiple comparisons. **D)** Quantification of VNC percent TUNEL area normalized to control (n=14) for  $npc1a^{57a}$  (n=14),  $brn^{fs.107}$  (n=15) and  $egh^7$  (n=14) shows significant increases for  $npc1a^{57a}$  (\*\*; p=0.0036),  $brn^{fs.107}$  (\*\*; p=0.0046) and  $egh^7$  (\*\*\*) (p=0.0001) from Kruskal Wallance test with multiple comparisons.
